# Supplementary material for: Within-host whole genome analysis of an antibiotic resistant Pseudomonas aeruginosa strain sub-type in cystic fibrosis
Source: PubMed Central journal article supplement (PMC5342179; doi:10.1371/journal.pone.0172179), 2017-03-08

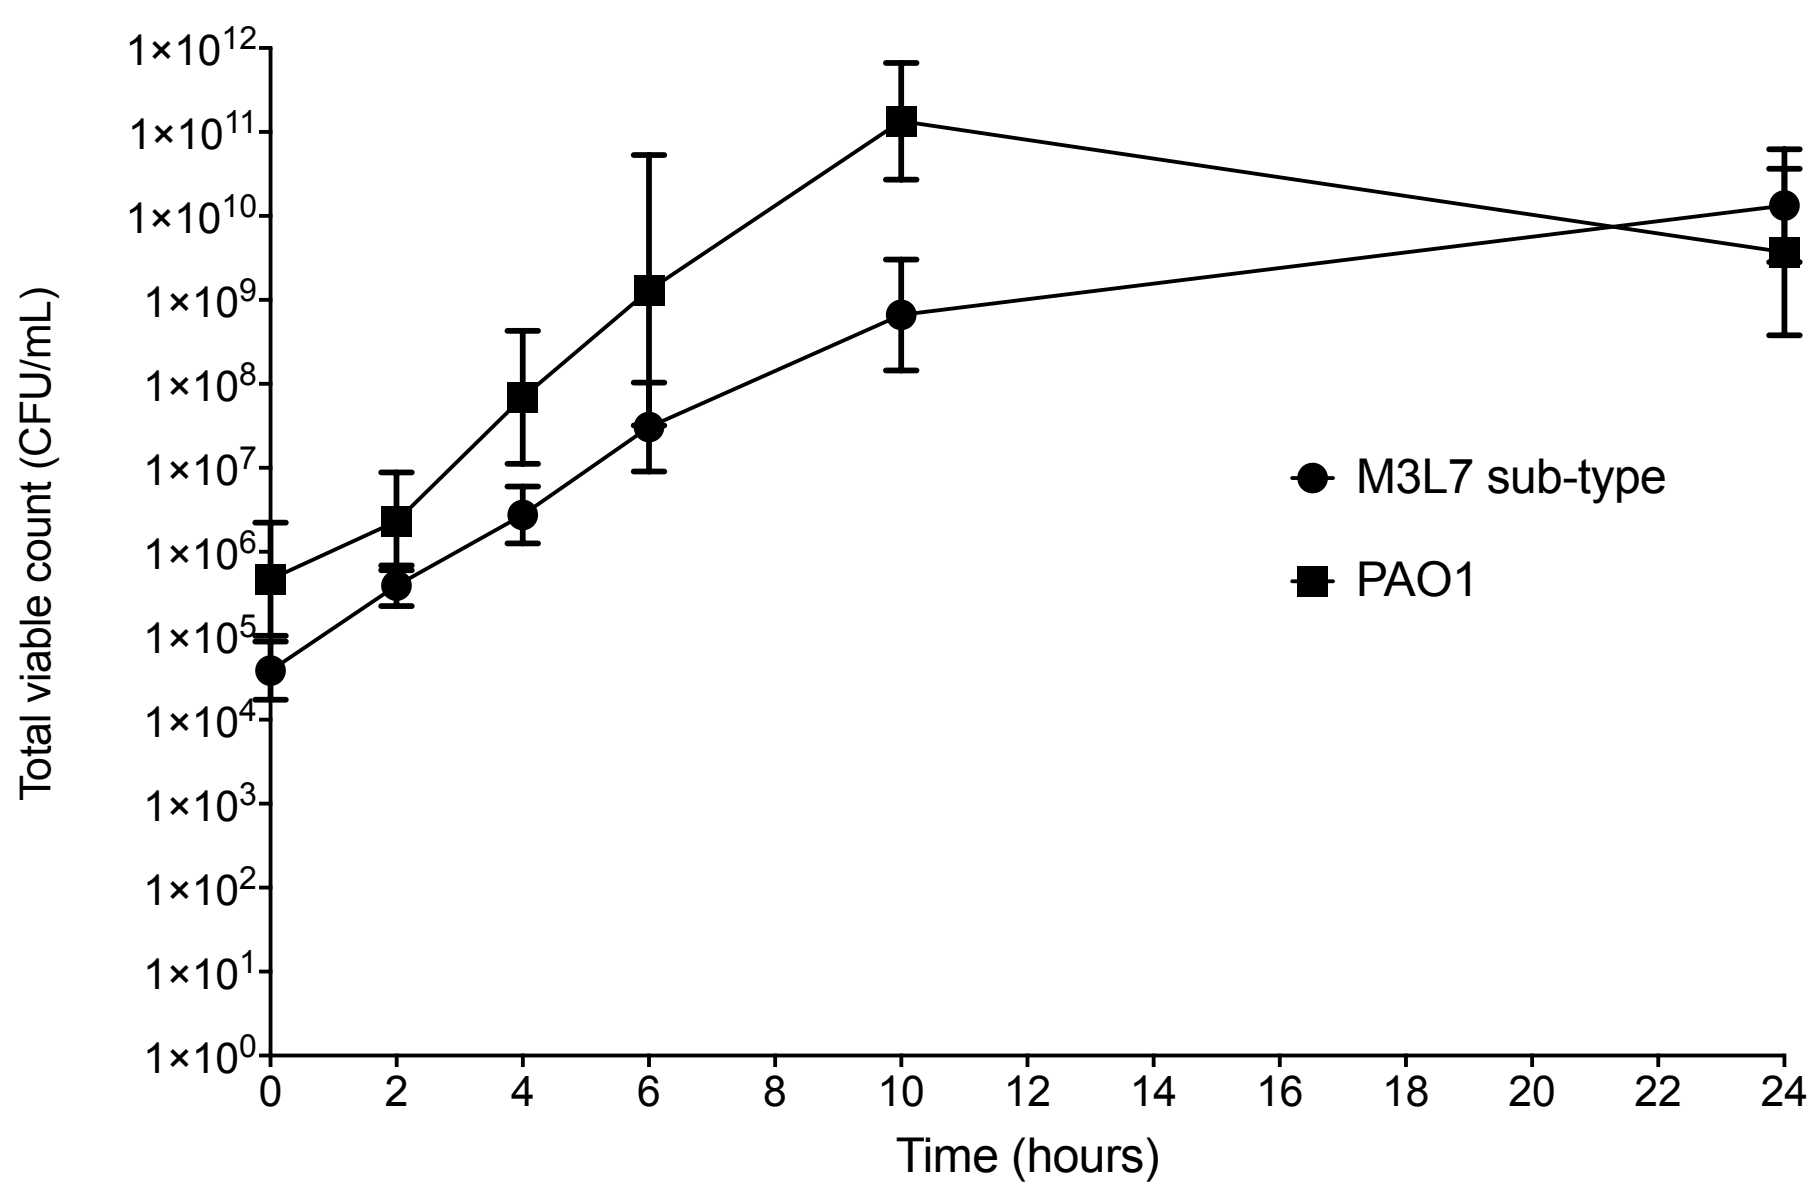

Supplement: pone.0172179.s004.pdf [file pone.0172179.s004.pdf]
